# Supplementary material
Source: MDPI journal article supplement (https://www.mdpi.com/2673-4591/19/1/38)

**ECP**  
**2022**

The 1st International Electronic Conference  
on Processes: Processes System Innovation

17-31 MAY 2022 | ONLINE

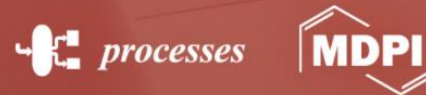

**utad** UNIVERSIDADE  
DE TRÁS-OS-MONTES  
E ALTO DOURO

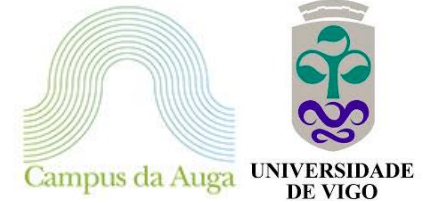

  
AOPs PhD School

 **VR**  
CENTRO  
DE QUÍMICA  
VILA REAL

# Removal of methylene blue from aqueous solution by application of plant-based coagulants

Nuno Jorge<sup>1,2</sup> \*; Ana R. Teixeira<sup>2</sup>; Leonilde Marchão<sup>2</sup>; Pedro B. Tavares<sup>2</sup>; Marco S. Lucas<sup>2</sup>; José A. Peres<sup>2</sup>

<sup>1</sup> Escuela Internacional de Doctorado (EIDO), Campus da Auga, Campus Universitario de Ourense, Universidade de Vigo, As Lagoas, 32004, Ourense, Spain

<sup>2</sup> Centro de Química de Vila Real (CQVR), Departamento de Química, Universidade de Trás-os-Montes e Alto Douro (UTAD), Quinta de Prados, 5001-801, Vila Real, Portugal

\* njorge@uvigo.es

**The 1st International Electronic Conference on Processes: Processes System Innovation**

**Session 2. Environmental and Green Processes**

17 – 31 May 2022

# Introduction

Contributes to fulfilling the basic living (clothing) requirements of human life;

The wastewater discharged from textile dyeing industry contains a total of 72 toxic chemicals, out of which 30 chemicals cannot be removed by waste treatment processes;

Formation of many types of cancers of different organs such as bladder, spleen, liver and normal aberrations in model organisms and chromosomal deformities in mammalian cells;

Textile dyes are characterized by high color density, high concentration of recalcitrant organics and pH and high turbidity.

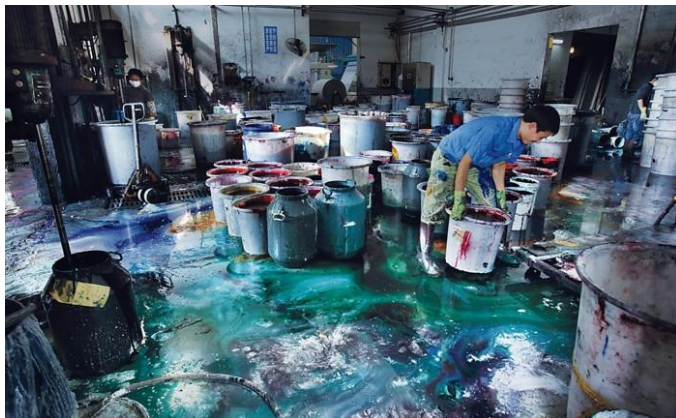

Textile dye factory

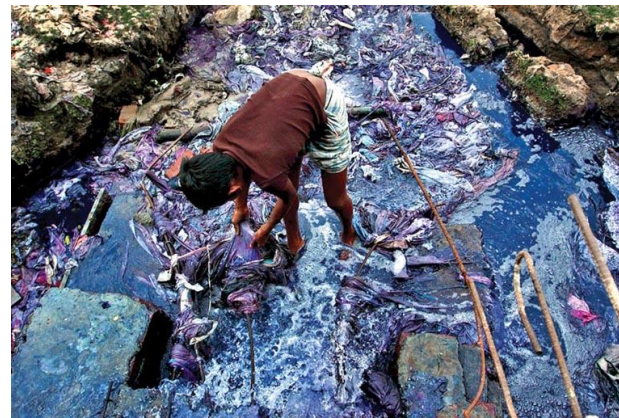

River polluted by textile dyes

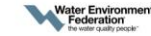

## Textiles wastewater treatment technology: A review

Dongyang Deng,<sup>1,\*</sup> Mehdi Lamssali,<sup>1</sup> Niroj Aryal,<sup>2</sup> Andrea Ofori-Boadu,<sup>1</sup> Manoj K. Jha,<sup>3</sup> Raymond E. Samuel<sup>4</sup>

CRITICAL REVIEWS IN ENVIRONMENTAL SCIENCE AND TECHNOLOGY  
2017, VOL. 47, NO. 19, 1836–1876  
<https://doi.org/10.1080/10643389.2017.1393263>

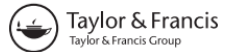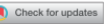

## Biological methods for textile dye removal from wastewater: A review

Deepika Bhatia<sup>a</sup>, Neeta Raj Sharma<sup>a</sup>, Joginder Singh<sup>b,a</sup>, and Rameshwar S. Kanwar<sup>a,b</sup>

<sup>a</sup>Department of Biotechnology, School of Bioengineering and Biosciences Lovely Professional University, Phagwara, Punjab, India; <sup>b</sup>Department of Agricultural and Biosystems Engineering, Iowa State University, Ames, Iowa, USA

Heliyon 5 (2019) e02711

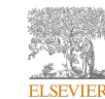

Contents lists available at ScienceDirect

Heliyon

journal homepage: [www.heliyon.com](http://www.heliyon.com)

Heliyon

Review article

### Textile finishing dyes and their impact on aquatic environs

Mohamed Berradi<sup>a,\*</sup>, Rachid Hsissou<sup>a,b,\*</sup>, Mohammed Khudhair<sup>c</sup>, Mohammed Assouag<sup>b</sup>, Omar Cherkaoui<sup>d</sup>, Abderrahim El Bachiri<sup>e</sup>, Ahmed El Harfi<sup>a</sup>

<sup>a</sup>Laboratory of Agricultural Resources, Polymers and Process Engineering, Department of Chemistry, Faculty of Science, Ibn Tofail University, B.P. 133-14000, Kenitra, Morocco

<sup>b</sup>Team of Innovative Materials and Mechanical Manufacturing Process, ENSAM, University Moulay Ismail, B.P. 15290, Al Mansour, Meknes, Morocco

<sup>c</sup>Faculty of Engineering and Information Technology, Anran University, Anran, Yemen

<sup>d</sup>Laboratory REMTEX, High School of Textile and Clothing Industries, Casablanca, Morocco

<sup>e</sup>Royal Naval School, University Department, Boulevard Sour - Jdid, Casablanca, Morocco

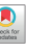

## Types of textile dyes

- Chemical classification
- Water soluble dyes
- Insoluble dyes in water

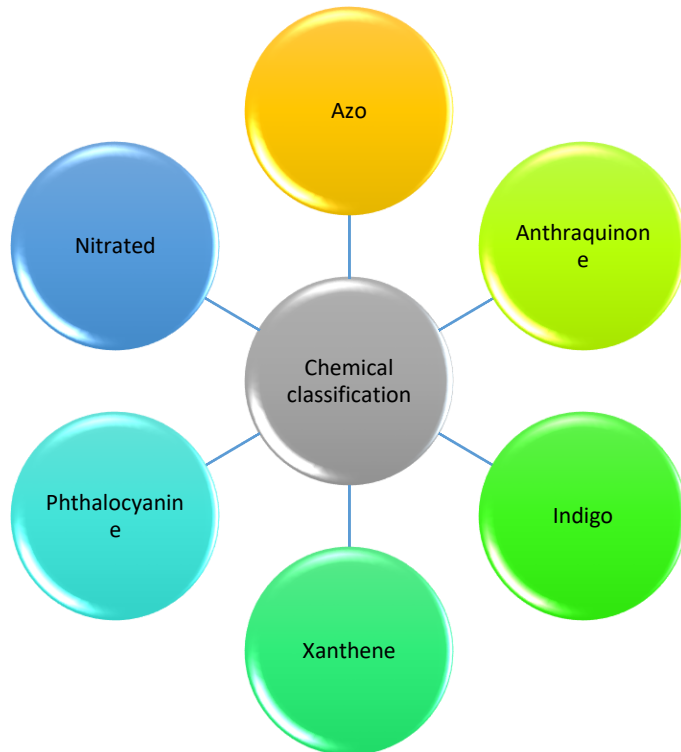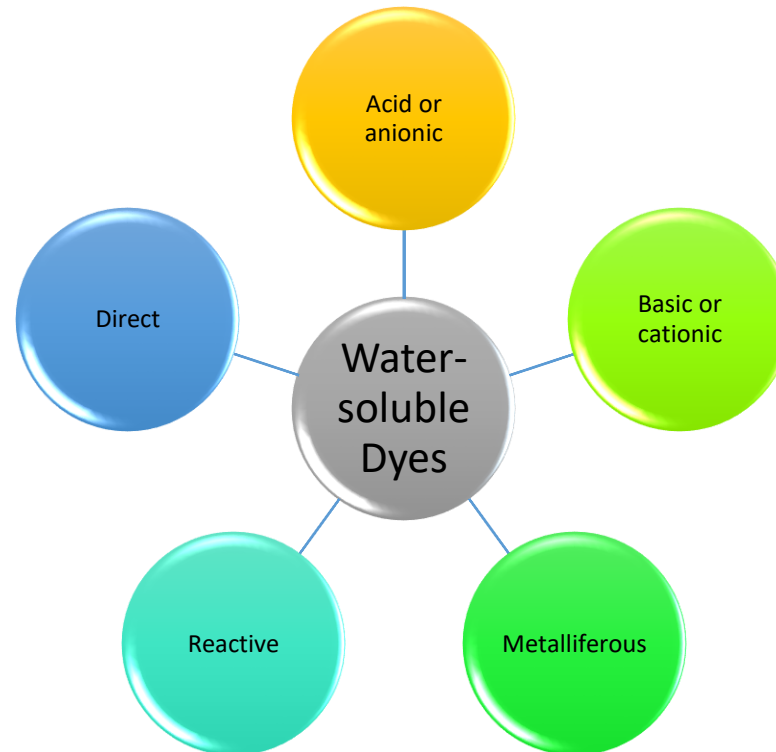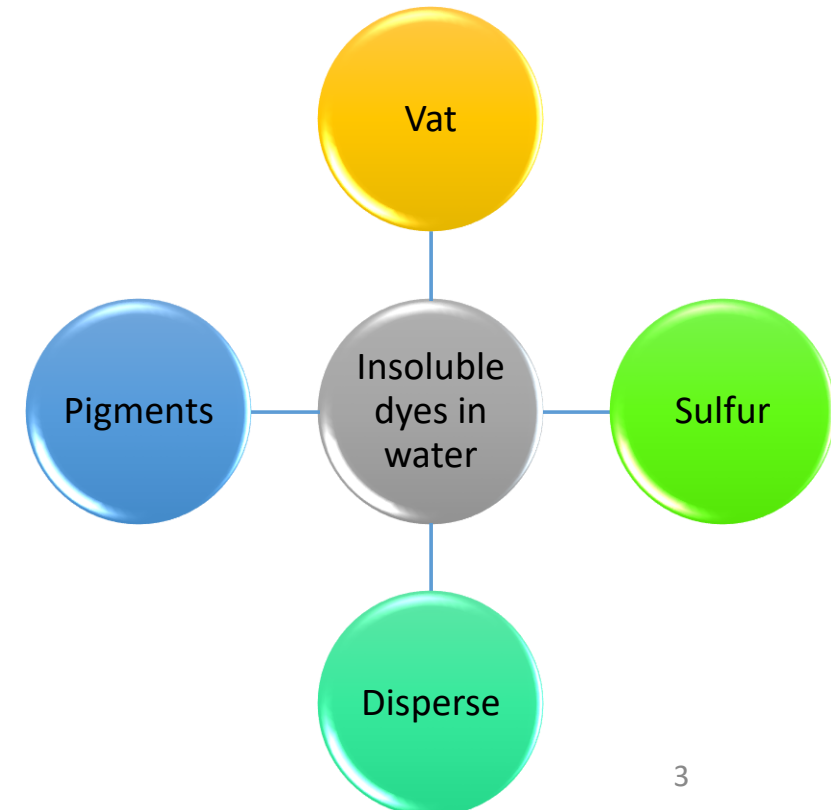

Review article

### Textile finishing dyes and their impact on aquatic environs

Mohamed Berradi<sup>a,\*</sup>, Rachid Hissou<sup>a,b,\*</sup>, Mohammed Khudhair<sup>c</sup>, Mohammed Assouag<sup>b</sup>, Omar Cherkaoui<sup>d</sup>, Abderrahim El Bachiri<sup>e</sup>, Ahmed El Harfi<sup>a</sup>

<sup>a</sup> Laboratory of Agricultural Resources, Polymers and Process Engineering, Department of Chemistry, Faculty of Science, Ibn Tofail University, B.P. 133-14000, Kenitra, Morocco

<sup>b</sup> Team of Innovative Materials and Mechanical Manufacturing Process, ENSAM, University Moulay Ismail, B.P. 15290, Al Marsour, Meknes, Morocco

<sup>c</sup> Faculty of Engineering and Information Technology, Amran University, Amran, Yemen

<sup>d</sup> Laboratory REMTEX, High School of Textile and Clothing Industries, Casablanca, Morocco

<sup>e</sup> Royal Naval School, University Department, Boulevard Sour – Jdid, Casablanca, Morocco

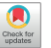

# Coagulation-flocculation-decantation (CFD)

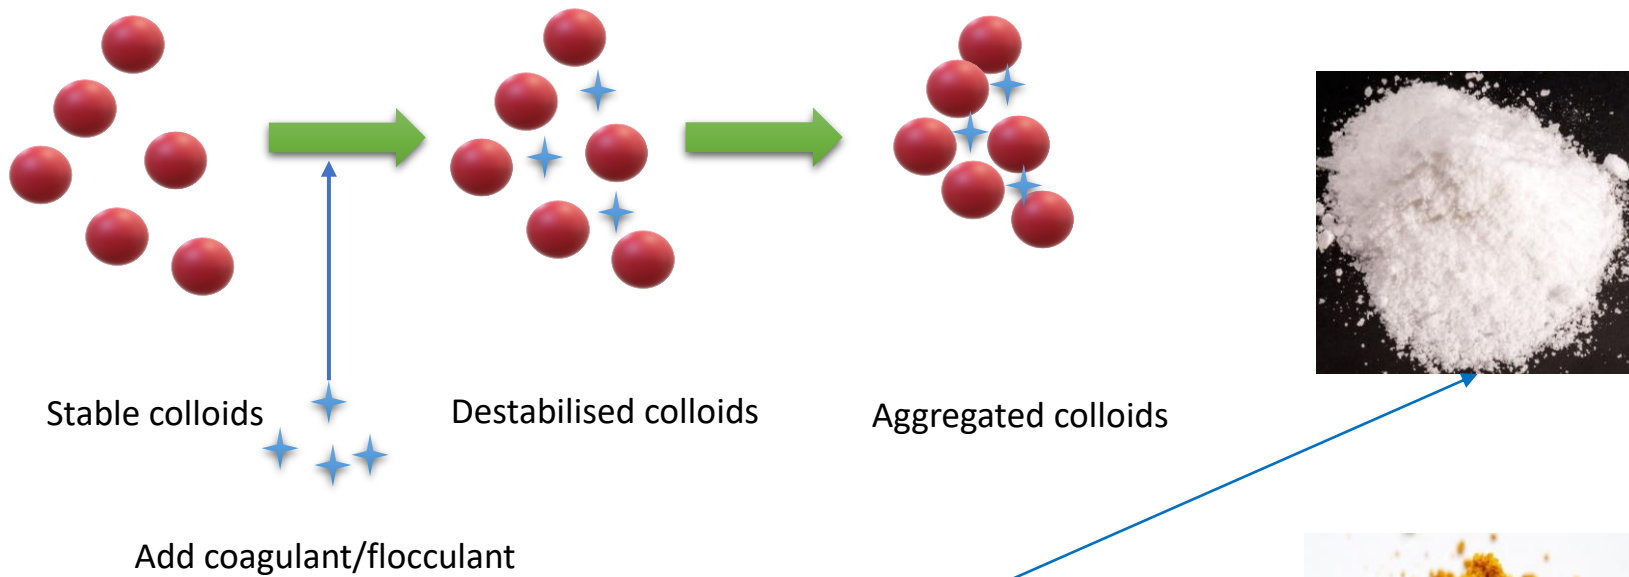

➤ Hydrolysable metal salts (mainly, **aluminum** and **iron**)

Most used on waster treatment

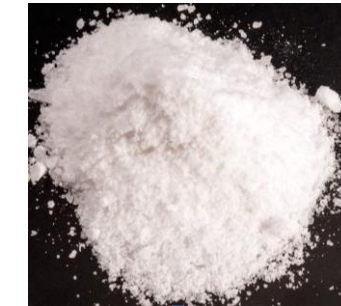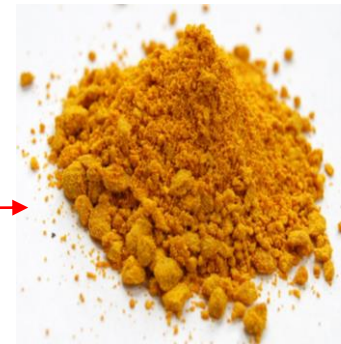

## Disadvantages

**Aluminum**

- Dialysis encephalopathy
- Alzheimer's disease

**Iron**

- Generally corrosive
- Strongly dependent on the pH
- The leach cannot be recycled



## Plant species collected during this work, for the development of **plant-based coagulants**

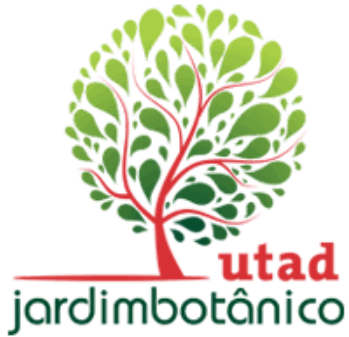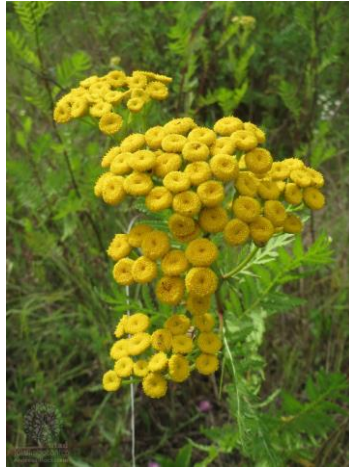

*Tanacetum vulgare*  
L. (seeds)

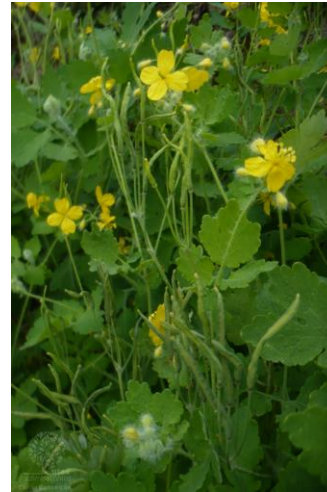

*Chelidonium majus*  
L. (seeds)

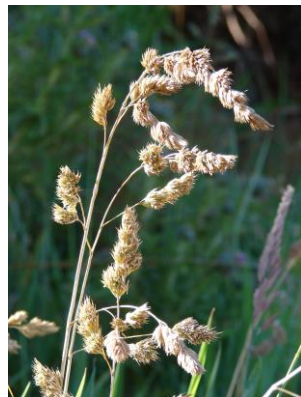

*Dactylis glomerata*  
L. (seeds)

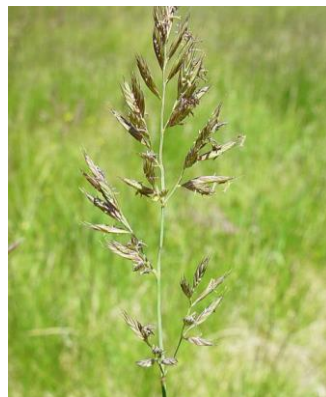

*Festuca ampla*  
Hack. (seeds)

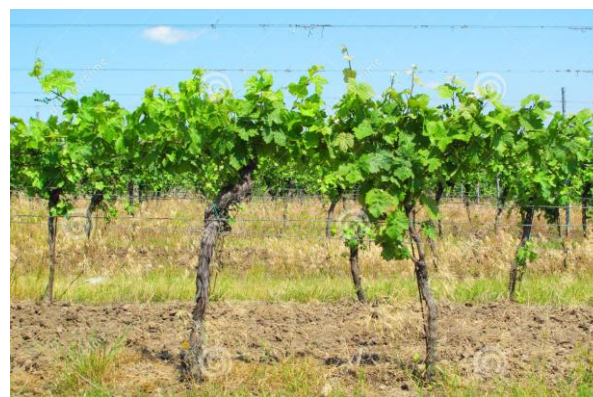

*Vitis vinífera* L. (rachis)

## Works performed with plant-based coagulants

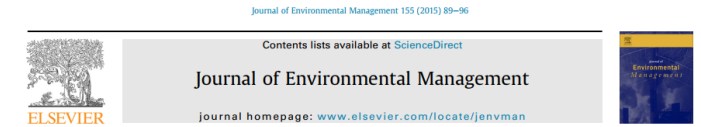

### Adsorption of Disperse Orange 30 dye onto activated carbon derived from Holm Oak (*Quercus ilex*) acorns: A 3<sup>k</sup> factorial design and analysis

Umran Tezcan Un<sup>a,\*</sup>, Funda Ates<sup>b</sup>, Nihal Erginel<sup>c</sup>, Oznur Ozcan<sup>d</sup>, Emre Oduncu<sup>d</sup>

<sup>a</sup> Anadolu University, Department of Environmental Engineering, Eskişehir, Turkey  
<sup>b</sup> Anadolu University, Department of Chemical Engineering, Eskişehir, Turkey  
<sup>c</sup> Anadolu University, Department of Industrial Engineering, Eskişehir, Turkey  
<sup>d</sup> Anadolu University, Institute of Science, Eskişehir, Turkey

#### ARTICLE INFO

Article history:  
 Received 10 December 2014  
 Received in revised form  
 28 February 2015  
 Accepted 3 March 2015  
 Available online 13 March 2015

Keywords:  
 Holm Oak acorns  
 Activated carbon  
 Factorial design  
 Dye removal

#### ABSTRACT

In this study, samples of activated carbon were prepared from Holm Oak acorns by chemical activation with H<sub>2</sub>PO<sub>4</sub>, ZnCl<sub>2</sub> and KOH as activating agents. The samples were characterized by SEM, BET, FTIR and elemental analysis, and were then evaluated for the removal of Disperse Orange 30 (DO30) dyes from aqueous solutions. A 3<sup>k</sup> factorial design was used to determine the interaction effects of carbonization temperature, pH, dosage of adsorbent and type of activating agent on the amount of dye removal. Also, level of effectiveness factors were determined by conducting regression models for maximum adsorption efficiency. Of all the samples, the sample generated using ZnCl<sub>2</sub> as an activating agent showed a maximum dye removal efficiency of 93.3% at a carbonization temperature of 750 °C, a pH of 2 and an adsorbent dosage of 0.15 g/25 ml. The analysis shows that the adsorption process depends significantly on the type of activating agent used in the preparation of activated carbon.

© 2015 Elsevier Ltd. All rights reserved.

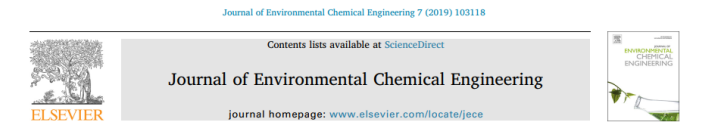

### Evaluation of coagulating efficiency and water borne pathogens reduction capacity of *Moringa oleifera* seed powder for treatment of domestic wastewater from Zomba, Malawi

Ephraim Vunain<sup>a,\*</sup>, Effita Fifi Masoamphambe<sup>b</sup>, Placid Mike Gabriel Mpekutula<sup>b</sup>, Maurice Monjerezi<sup>c</sup>, Anita Etale<sup>c</sup>

<sup>a</sup> Department of Chemistry, Chancellor College, University of Malawi, P.O. Box 280, Zomba, Malawi  
<sup>b</sup> Department of Biological Sciences, Chancellor College, University of Malawi, P.O. Box 280, Zomba, Malawi  
<sup>c</sup> Department of Chemistry, University of the Witwatersrand, Private Bag 3 PO WITS 2050, Johannesburg, South Africa

#### ARTICLE INFO

Keywords:  
*Moringa oleifera*  
 Natural coagulant  
 Wastewater clarification  
 Physico-chemical  
 Microbial contamination  
 Wastewater treatment

#### ABSTRACT

For many communities in the developing world, conventional water treatment methods are often unaffordable because of the high cost associated with them and unavailability of chemical coagulants in the developing countries. Employing *Moringa oleifera* seed (as powder or extract) to treat municipal domestic wastewater effluent presents an alternative practice to improving water quality of existing wastewater treatment plants in developing countries. In the present study, domestic wastewater from a local wastewater treatment plant in Zomba, Malawi, was treated by *Moringa oleifera* seed powder in batch tests. The objective was to investigate the potential of *Moringa oleifera* seed powder in enhancing domestic wastewater treatment through the reduction of microbial load, turbidity and total dissolved solids (TDS). *Moringa oleifera* powder seed reduced turbidity from 287 to 38.8 Nephelometric turbidity unit (NTU), increased pH from 4.3 to 7.1, and set total dissolved solids (TDS) at standards recommended by World Health Organization guidelines for drinking water. Optimum reduction in microbial load was observed at a dosage of powder of 15 L<sup>-1</sup>, with particular potency against *Salmonella* and *Shigella* spp. However, each dose of *Moringa oleifera* seed powder showed its own ideal settling (contact) time for microbe reduction before regrowth of microbes.

## Objectives

Considering the necessity to perform treatment of textile wastewater by eco-friendly coagulants, the aim of this work is:

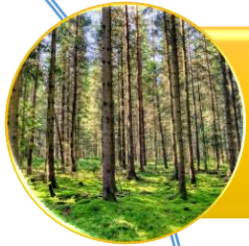

(1) To produce and characterize the plant-based coagulants

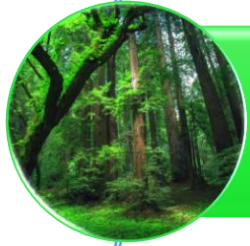

(2) To optimize the CFD process

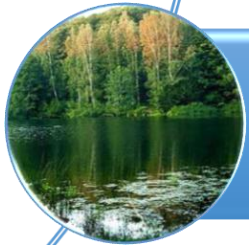

(3) To evaluate the application of bentonite as a flocculant agent

# Material and methods

Name, chemical structure, maximum absorbance and molecular weight of MB

| Name                        | Chemical structure                                                                | $\lambda_{\max}$ (nm) | Molecular weight (g/mol) |
|-----------------------------|-----------------------------------------------------------------------------------|-----------------------|--------------------------|
| Methylene blue<br>(azo dye) | 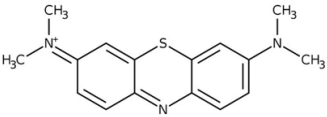 | 665, 300 and 250 nm   | 319.85                   |

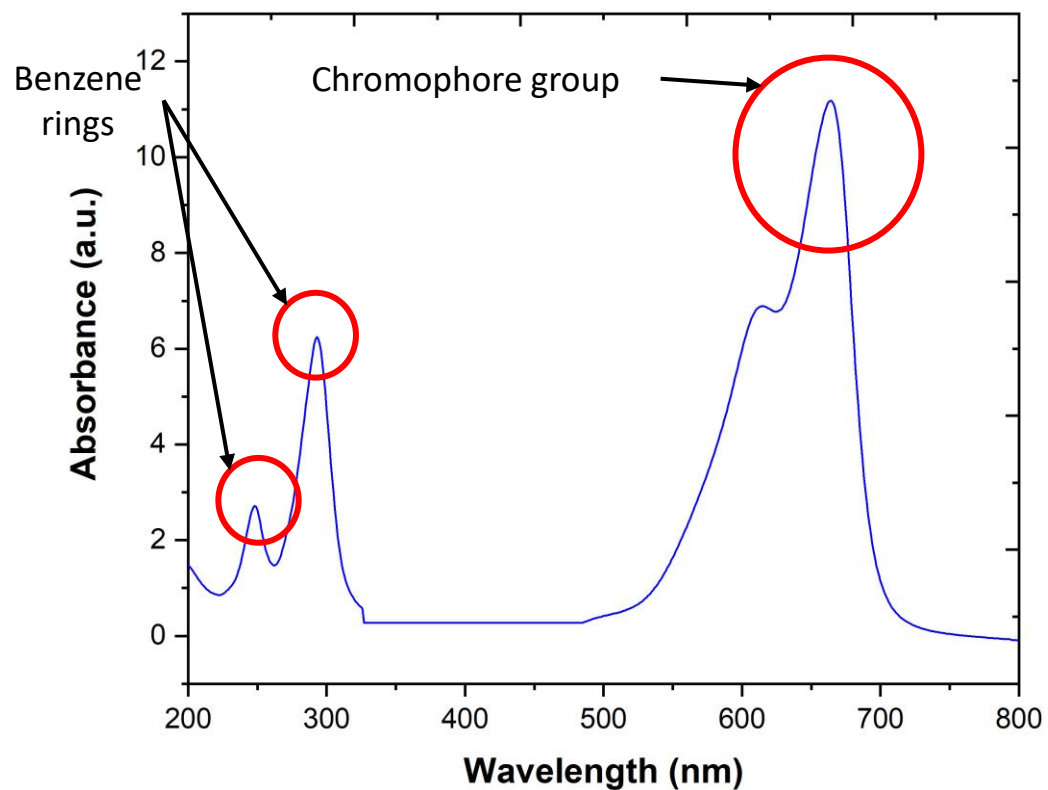

Device used for CFD process

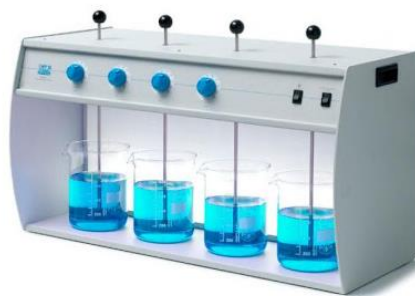

Jar-Test apparatus (ISCO JF-4)

## Plant-based coagulants preparation

Separation of seeds from plants

Washing and drying at 70°C/ 24h

Crushing

Sieve

Drying at 70°C/ 24 h

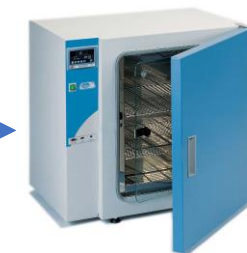

Laboratory incubator

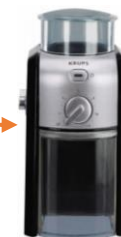

Groundnut miller

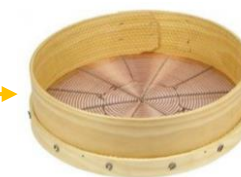

Sieve (Mesh of 150 μm)



## Characterization of plant-based coagulants

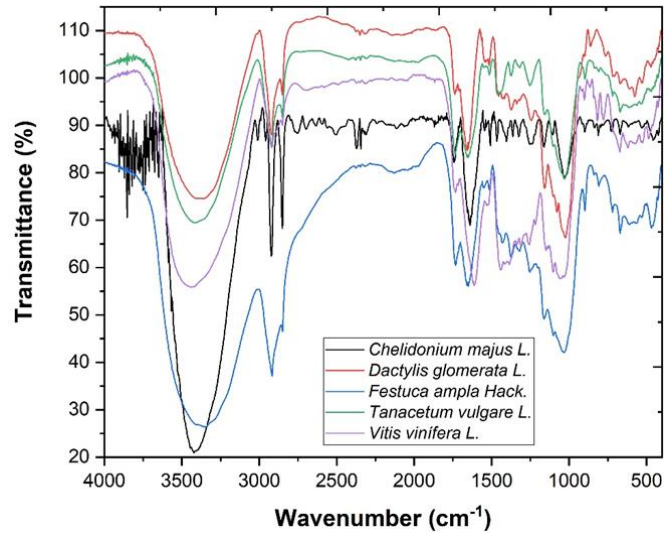

| Vibration bands (cm <sup>-1</sup> ) | Compounds                                                                                                                                               |
|-------------------------------------|---------------------------------------------------------------------------------------------------------------------------------------------------------|
| 3421.72                             | Stretching vibrations of OH groups (from water, alcohols, phenols, carbohydrates, peroxides) as well as amides                                          |
| 2920.23 and 2850.79                 | C-H stretching vibrations specific to CH <sub>3</sub> and CH <sub>2</sub> from lipids, methoxy derivatives, C-H (aldehydes), including cis double bonds |
| 898.83 – 1253.73                    | C–O–C, C–C, and C–O stretching vibrations from carbohydrates                                                                                            |

FTIR analysis of plant-based coagulants

B.E.T. analysis of the plant-based coagulants

| Coagulants   | S <sub>BET</sub> (m <sup>2</sup> /g) | V <sub>total pore</sub> (cm <sup>3</sup> /g) | Particle size (nm) |
|--------------|--------------------------------------|----------------------------------------------|--------------------|
| C. Majus     | 0.05                                 | n.q.                                         | n.q.               |
| D. Glomerata | 0.06                                 | n.q.                                         | n.q.               |
| F. Ampla     | 0.18                                 | n.q.                                         | n.q.               |
| T. Vulgare   | 0.03                                 | n.q.                                         | n.q.               |
| V. vinifera  | 0.50                                 | n.q.                                         | n.q.               |

The BET analysis showed that all plant-based coagulants had a low BET surface area. The shape of its N<sub>2</sub> adsorption-desorption isotherm was of type I isotherm, typical of microporous solids having relatively small external surfaces as defined by the International Union of Pure and Applied Chemistry (IUPAC) classification

Plant-based coagulants exhibited a heterogeneous and relatively porous morphology. The spaces available (represented in dark) may facilitate adsorption of the MB contaminant.

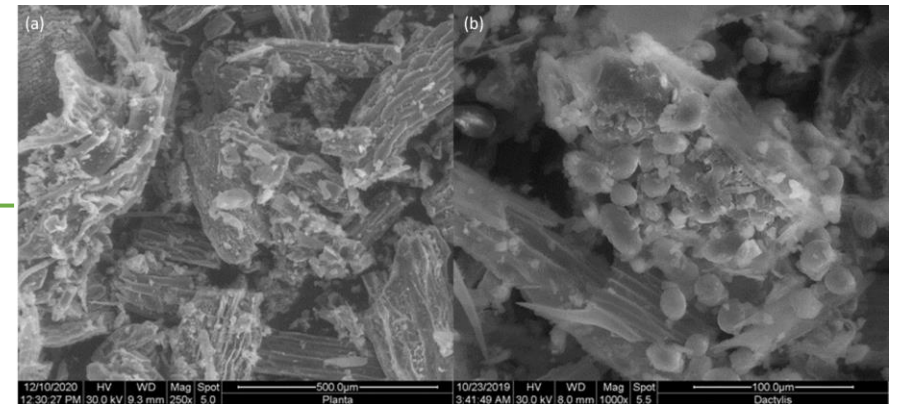

SEM images of (a) C. majus and (b) D. glomerata



# Results and discussion

## Coagulation-flocculation-decantation process optimization

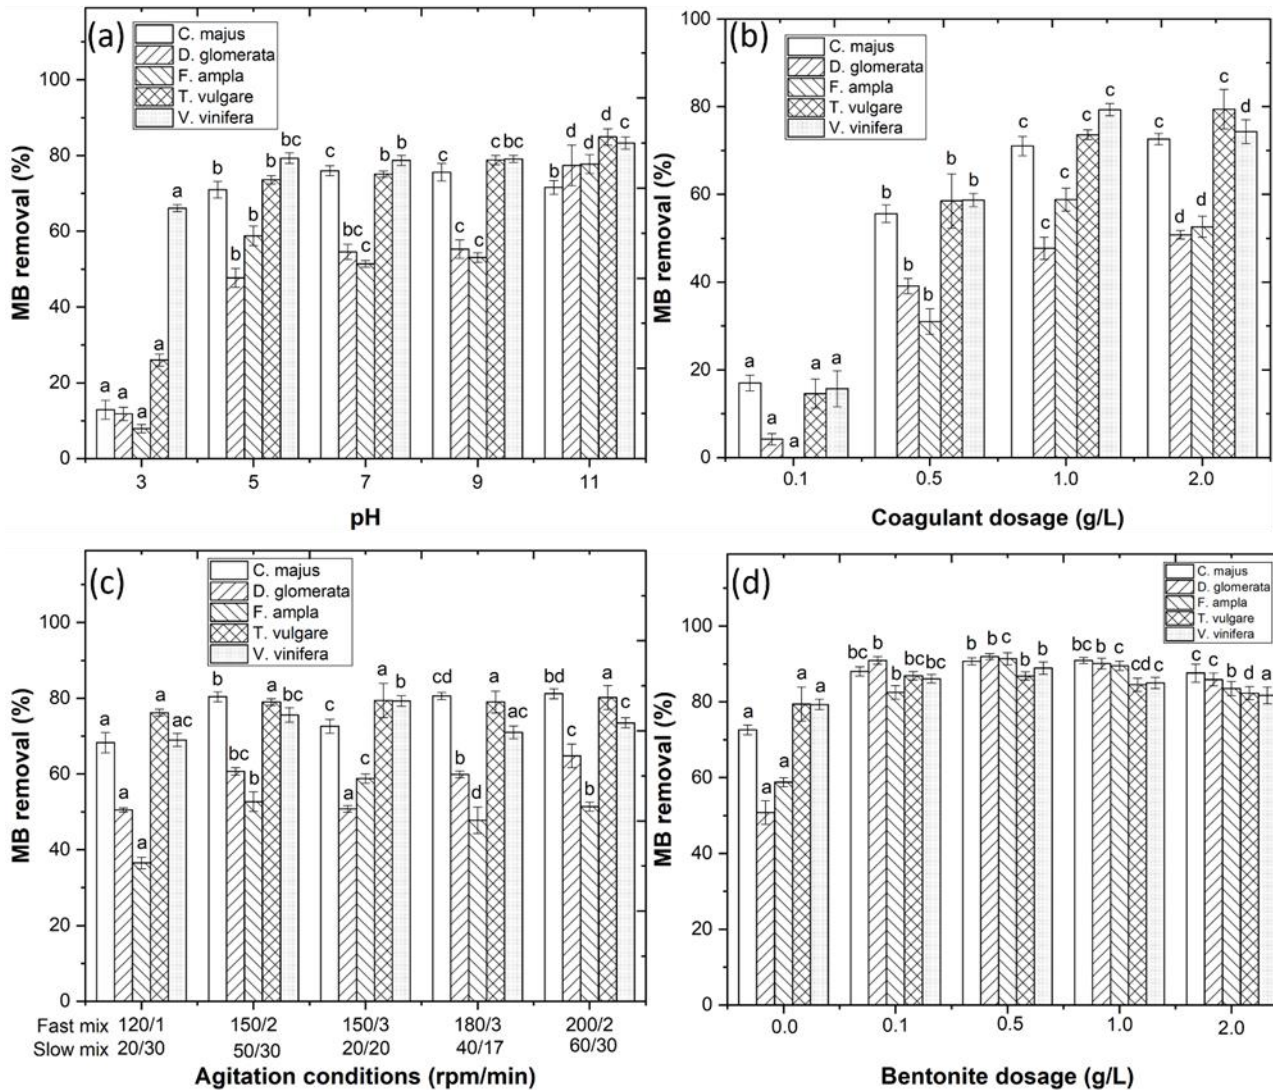

Best operational conditions

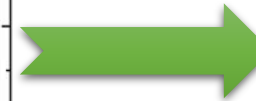

| Coagulants   | pH  | Coagulant dosage (g/L) | Fast mix (rpm/min) | Slow mix (rpm/min) | [Bentonite] (g/L) |
|--------------|-----|------------------------|--------------------|--------------------|-------------------|
| C. majus     | 5.0 | 2.0                    | 200/2              | 60/30              | 1.0               |
| D. glomerata | 5.0 | 2.0                    | 200/2              | 60/30              | 0.5               |
| F. ampla     | 5.0 | 1.0                    | 150/3              | 20/20              | 0.5               |
| T. vulgare   | 5.0 | 2.0                    | 150/3              | 20/20              | 0.1               |
| V. vinifera  | 5.0 | 1.0                    | 150/3              | 20/20              | 0.5               |

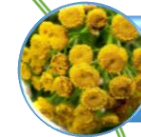

The pH was varied from 3.0 to 11.0 and the results showed a MB removal of 71.0, 47.7, 58.8, 73.6 and 79.3%, respectively

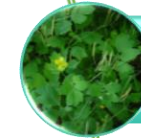

The coagulant dosage was varied (0.1 – 2.0 g/l) and results showed a MB removal of 72.6, 50.8, 58.8, 79.4 and 79.3%, respectively

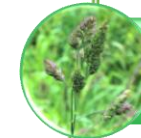

The effect of mixing conditions was also considered in this work and results showed a MB removal of 81.2, 64.8, 58.8, 79.4 and 79.3%, respectively

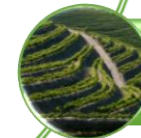

Bentonite was added as a flocculant aid and results showed a MB removal of 90.9, 91.9, 91.4, 86.9 and 88.9%, respectively

Optimization of CFD process with variation of (a) pH (3.0 – 11.0), (b) coagulant dosage (0.1 – 2.0 g/L), (c) agitation conditions and (d) bentonite dosage (0.0 – 2.0 g/L), with sedimentation time = 30 min. Means in bars with different letters represent differences ( $p < 0.05$ ) within each coagulant (C. majus, D. glomerata, F. ampla, T. vulgare and V. vinifera) by comparing wastewaters

## Conclusions

Based in the results, it is concluded:



(1) The plant-based coagulants are carbon-based materials with porous structures that can adsorb the contaminants



(2) Under the best operational conditions, the plant-based coagulants achieve a high removal of MB from aqueous solution



(3) The addition of bentonite significantly increase the efficiency of the CFD process



# Acknowledgements

- The authors thank the North Regional Operational Program (NORTE 2020) and the European Regional Development Fund (ERDF), and express their appreciation for the financial support of the Project AgriFood XXI, operation nº NORTE-01-0145-FEDER-000041, and to the Fundação para a Ciência e a Tecnologia (FCT) for the financial support provided to CQVR through UIDB/00616/2020. Ana R. Teixeira also thanks the FCT for the financial support provided through the Bolsa de Doutoramento UI/BD/150847/2020.

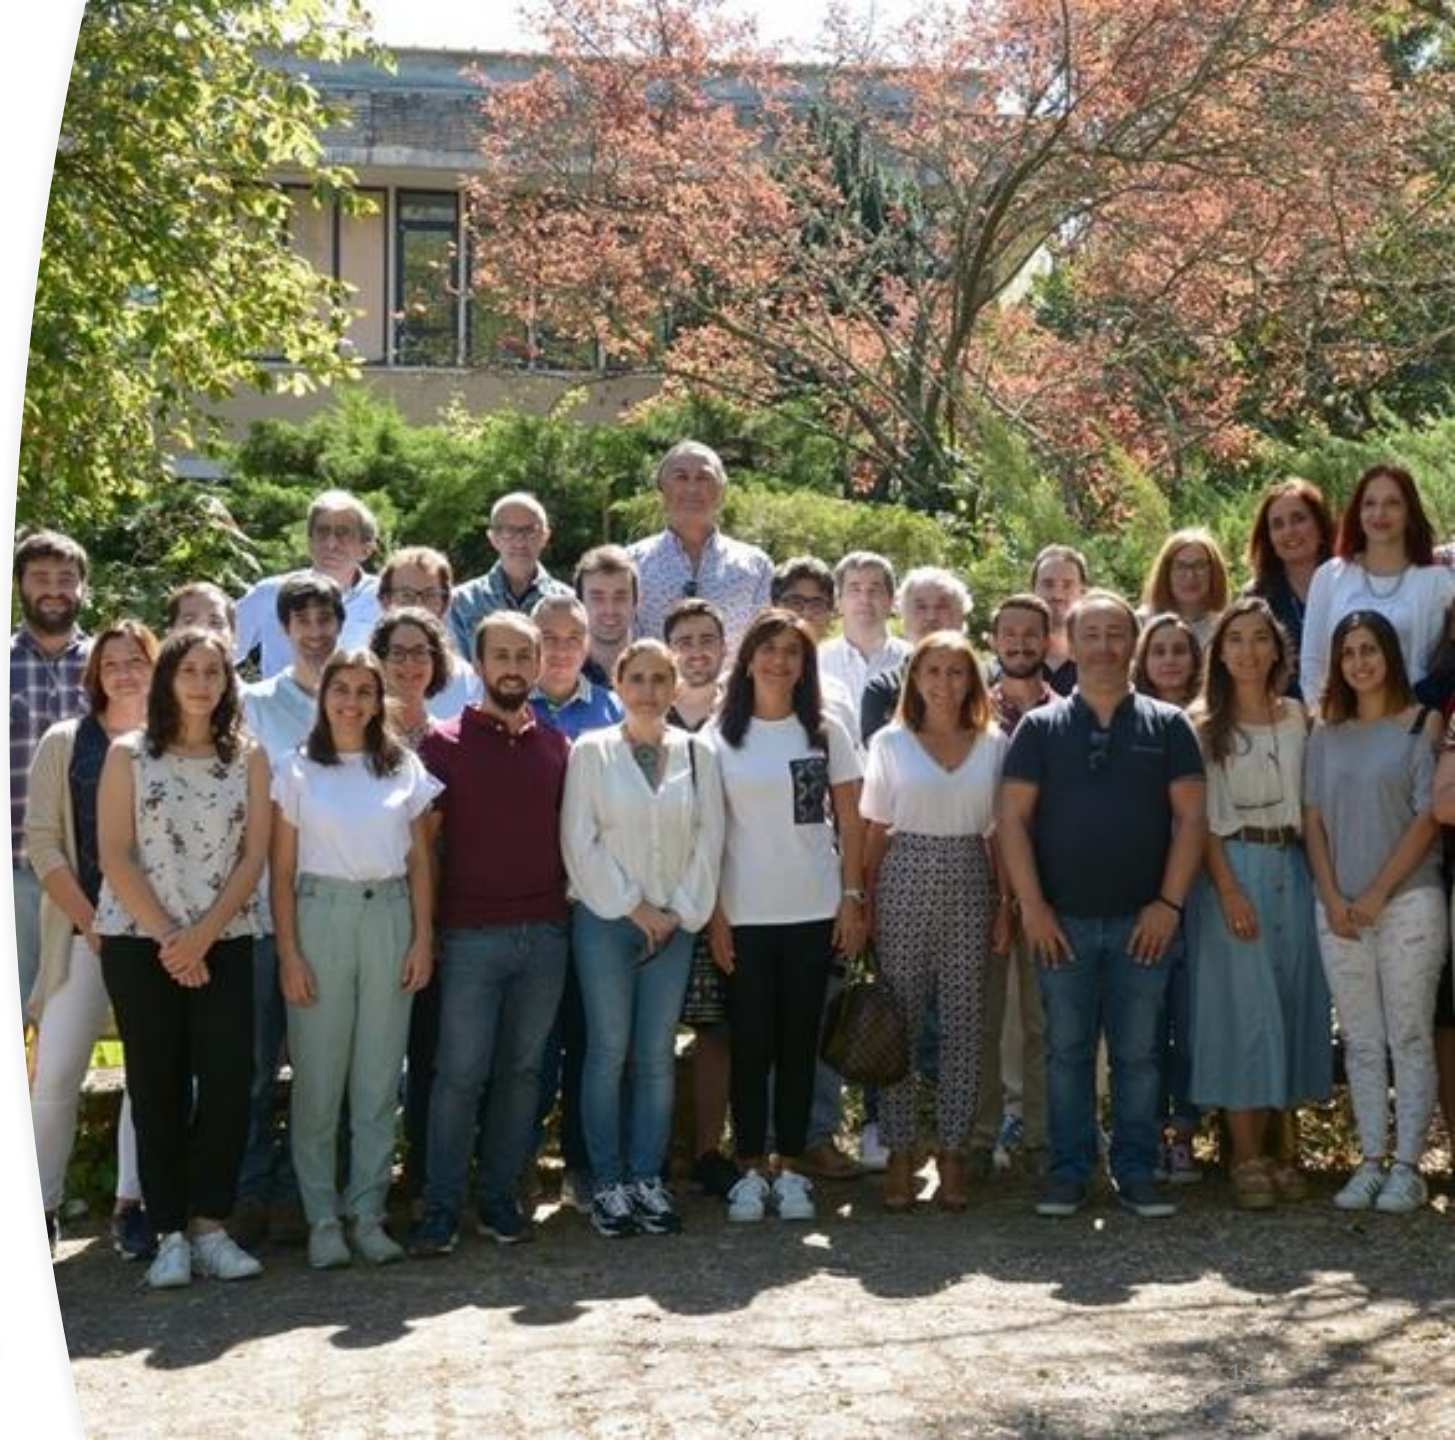



Thank you for  
your attention

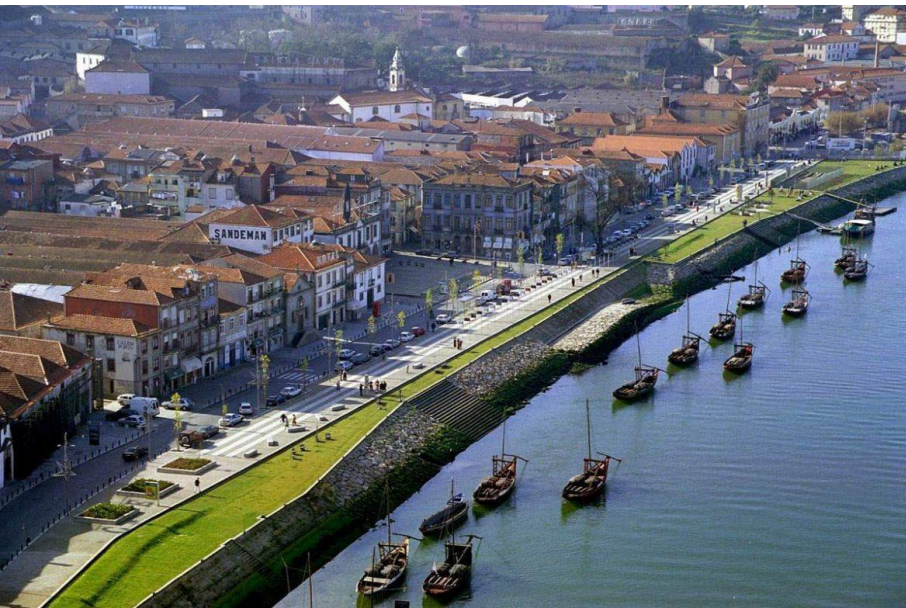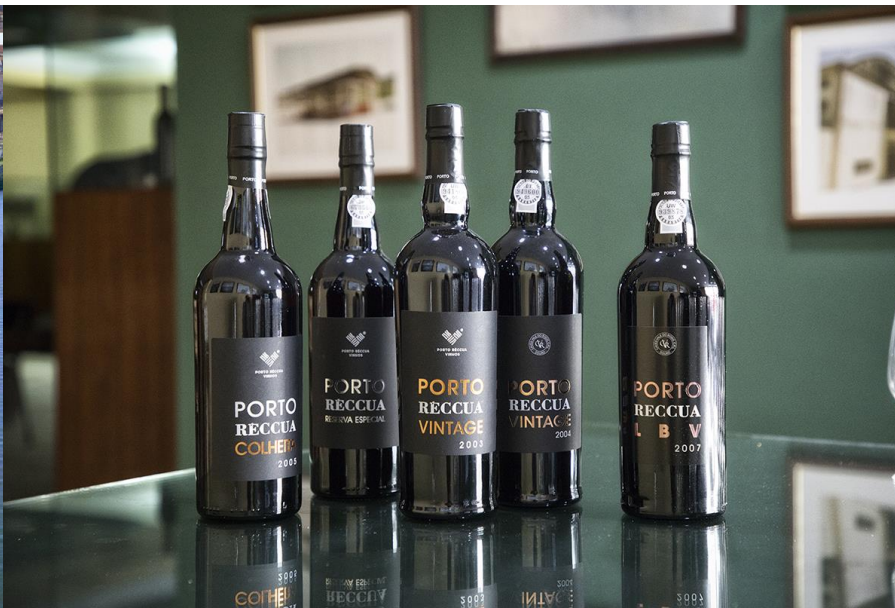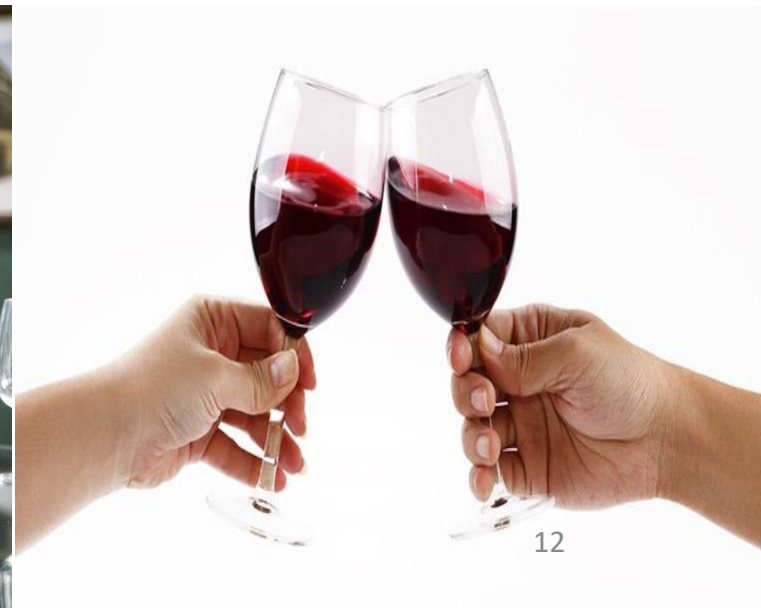

Supplement: s1 [file s1]
